# Supplementary material
Source: PubMed Central journal article supplement (PMC6055936)

**A**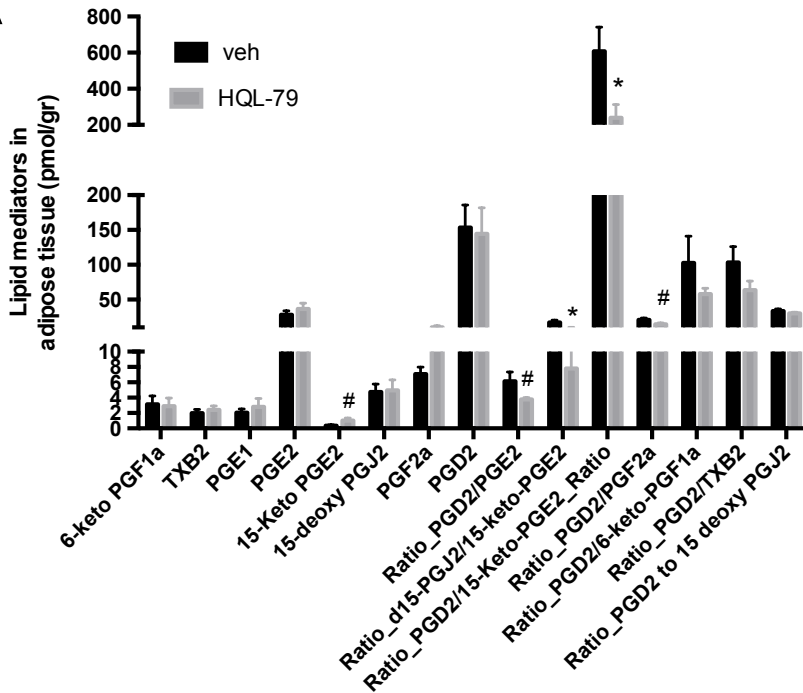**B**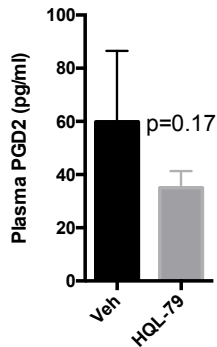

Supplement: NIHMS913720-supplement-1.pdf [file NIHMS913720-supplement-1.pdf]
